# Supplementary material
Source: Elsevier journal article supplement (https://www.sciencedirect.com/science/article/pii/S0300289622001661)
Supplement: mmc1 [file S0300289622001661:mmc1.pdf]

**Supplementary Figure 1: Flowchart of patients included in the study**

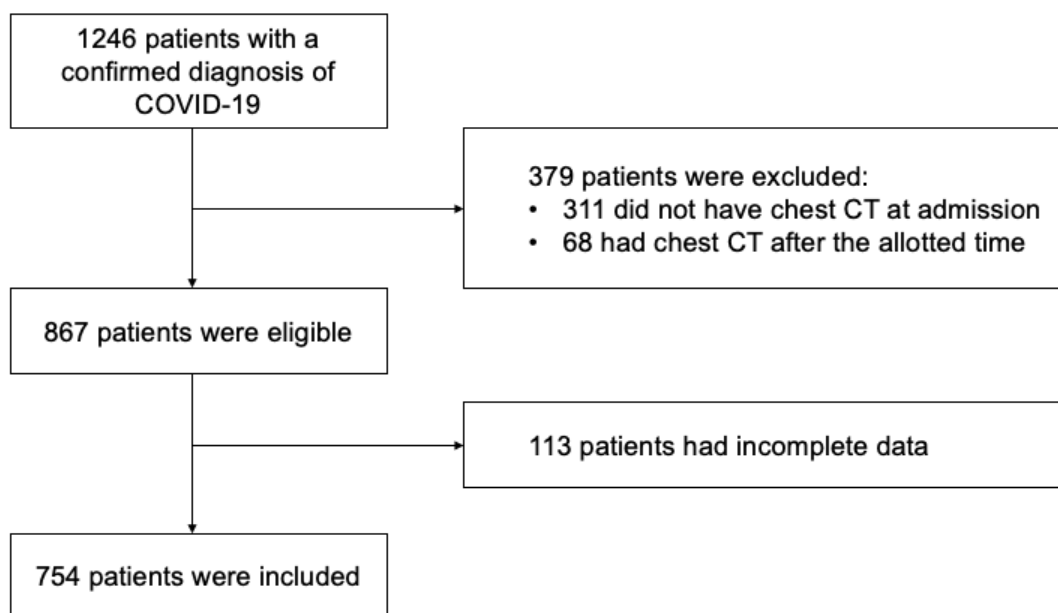

**Supplementary Table 1** Clinical and demographic characteristics of the study population

| General characteristics                                    | N = 754         | Comorbidities                                            | N = 754           |
|------------------------------------------------------------|-----------------|----------------------------------------------------------|-------------------|
| Age in years <sup>a</sup>                                  | 56.3 ± 14.7     | Hypertension                                             | 379 (50.3%)       |
| Distribution by age group in years                         |                 | Diabetes Mellitus                                        | 238 (31.6%)       |
| - 18 – 39                                                  | 108 (14.3%)     | Obesity                                                  | 224 (29.7%)       |
| - 40 – 49                                                  | 136 (18.0%)     | Chronic heart disease                                    | 132 (17.5%)       |
| - 50 – 59                                                  | 192 (25.5%)     | Chronic lung disease                                     | 110 (14.6%)       |
| - 60 – 69                                                  | 176 (23.3%)     | Coronary artery disease                                  | 63 (8.4%)         |
| - 70 – 79                                                  | 100 (13.3%)     | COPD                                                     | 48 (6.4%)         |
| - 80 or more                                               | 42 (5.6%)       | Chronic kidney disease                                   | 34 (4.5%)         |
| Male sex                                                   | 390 (51.7%)     | Active cancer                                            | 33 (4.4%)         |
|                                                            |                 | Chronic liver disease                                    | 8 (1.1%)          |
| <b>COVID-19 Diagnosis</b>                                  |                 | <b>Number of comorbidities</b>                           |                   |
| Positive RT-PCR for COVID-19 (N = 731)                     | 708 (93.9%)     | None                                                     | 143 (19.0%)       |
| Positive IgM Serology (N = 754)                            | 156 (20.7%)     | 1                                                        | 175 (23.21%)      |
| Positive IgG Serology (N = 754)                            | 150 (19.9%)     | 2 or more                                                | 436 (57.82%)      |
| Days of symptoms at hospitalization <sup>b</sup> (N = 748) | 8 (6-11)        |                                                          |                   |
| Days of symptoms at tomography <sup>b</sup> (N = 748)      | 9 (6-11)        |                                                          |                   |
| <b>Hospitalization</b>                                     | <b>N = 754</b>  | <b>Laboratory tests</b>                                  |                   |
| Ward                                                       | 685 (90.8%)     | Lymphocytes <sup>b</sup> (x10 <sup>3</sup> / uL)         | 870 (556 - 1284)  |
| ICU                                                        | 274 (36.3%)     | C-reactive protein <sup>b</sup> (mg / dL)                | 7 (3.34 – 13.5)   |
| Invasive mechanical ventilation                            | 171 (22.7%)     | Ferritin <sup>b</sup> (ng/mL)                            | 952 (426 – 1676)  |
| Days of hospitalization <sup>c</sup>                       | 7 (0-131, 4-13) | LDH <sup>b</sup> (U/L)                                   | 349 (270 – 465)   |
| - days in the ward <sup>c</sup>                            | 5 (1-65, 3-9)   | D-dimer <sup>b</sup> (mg / L FEU)                        | 0.9 (0.51 - 2.0)  |
| - days in the ICU <sup>c</sup>                             | 10 (1-82, 4-19) | Albumin <sup>a</sup> (g / dL)                            | 3.6 ± 0.5         |
|                                                            |                 | Procalcitonin <sup>b</sup> (ng / mL)                     | 0.1 (0.06 – 0.54) |
| <b>In-hospital death</b>                                   | <b>N = 754</b>  | High-sensitivity cardiac troponin <sup>b</sup> (pg / mL) | 10 (10 – 14.3)    |
| General death (N = 754)                                    | 130 (17.2%)     |                                                          |                   |
| Death in ICU (N = 274)                                     | 120 (43.7%)     |                                                          |                   |
| Death in MV (N = 171)                                      | 111 (64.9%)     |                                                          |                   |

*MV: invasive mechanical ventilation*

*Data reported in n (%), except when indicated otherwise. <sup>a</sup> mean ± standard deviation; <sup>b</sup> median (IQR); <sup>c</sup> median (min - max, IQR).*

**Supplementary Table 2** Factors associated with the need for invasive mechanical ventilation

| Clinical characteristics                                                                             | N     | No MV                    | MV                     | OR   | CI95%       | p*     |
|------------------------------------------------------------------------------------------------------|-------|--------------------------|------------------------|------|-------------|--------|
| Age ≥ 60 years old                                                                                   | 318   | 213 (67.0%)              | 105 (33.0%)            | 2.76 | 1.95 – 3.93 | <0.001 |
| Male sex                                                                                             | 390   | 301 (77.2%)              | 89 (22.8%)             | 1.02 | 0.72 – 1.43 | 0.924  |
| Smoking history                                                                                      | 177   | 119 (67.2%)              | 58 (32.8%)             | 2.12 | 1.41 – 3.19 | <0.001 |
| Obesity                                                                                              | 224   | 169 (75.4%)              | 55 (24.6%)             | 1.16 | 0.80 – 1.68 | 0.424  |
| Hypertension                                                                                         | 379   | 280 (73.9%)              | 99 (26.1%)             | 1.49 | 1.05 – 2.10 | 0.024  |
| Diabetes Mellitus                                                                                    | 238   | 171 (71.8%)              | 67 (28.2%)             | 1.55 | 1.09 – 2.21 | 0.015  |
| Coronary artery disease                                                                              | 63    | 43 (68.3%)               | 20 (31.7%)             | 1.66 | 0.95 – 2.91 | 0.075  |
| COPD                                                                                                 | 48    | 32 (66.7%)               | 16 (33.3%)             | 1.78 | 0.95 – 3.32 | 0.072  |
| Chronic heart disease                                                                                | 132   | 93 (70.5%)               | 39 (29.5%)             | 1.44 | 0.87 – 2.37 | 0.039  |
| Chronic lung disease                                                                                 | 110   | 90 (72.7%)               | 30 (27.3%)             | 1.34 | 0.85 – 2.12 | 0.214  |
| Chronic liver disease                                                                                | 8     | 3 (37.5%)                | 5 (62.5%)              | 5.82 | 1.38 – 24.6 | 0.017  |
| Chronic kidney disease                                                                               | 34    | 21 (61.8%)               | 13 (38.2%)             | 2.2  | 1.08 – 4.50 | 0.03   |
| Active cancer                                                                                        | 33    | 21 (63.6%)               | 12 (36.4%)             | 2.02 | 0.97 – 4.19 | 0.059  |
| Laboratory tests                                                                                     | N     | No MV                    | MV                     | OR   | CI95%       | p*     |
| Lymphocytes <sup>a,b</sup>                                                                           | 753   | 582, 935.5 (5,810-1,363) | 171, 741 (518 – 1,013) | 0.91 | 0.88 – 0.95 | <0.001 |
| C-reactive protein <sup>b</sup>                                                                      | 738   | 567, 6.3 (2.8-11.6)      | 171, 11.7 (5.7-16)     | 1.12 | 1.08 – 1.16 | <0.001 |
| Ferritin <sup>b</sup>                                                                                | 641   | 477, 832.2 (389 – 1676)  | 164, 1368 (660 – 1676) | 1.07 | 1.04 – 1.10 | <0.001 |
| LDH <sup>b</sup>                                                                                     | 628   | 470, 328 (259 – 425)     | 158, 420.5 (319 – 613) | 1.47 | 1.32 – 1.64 | <0.001 |
| D-Dimer <sup>b</sup>                                                                                 | 706   | 539, 0.8 (0.5-1.7)       | 167, 1.4 (0.7-3.3)     | 1.02 | 0.99 – 1.04 | 0.124  |
| Albumin <sup>c</sup>                                                                                 | 621   | 471, 3.6 ± 0.4           | 159, 3.3 ± 0.6         | 0.26 | 0.18 – 0.39 | <0.001 |
| Procalcitonin <sup>b</sup>                                                                           | 177   | 82, 0.1 (0 – 0.1)        | 95, 0.3 (0.1-1.2)      | 2.47 | 1.36 – 4.47 | 0.003  |
| Cardiac troponin <sup>a,b</sup>                                                                      | 570   | 415, 10 (10-10)          | 155, 10.6 (10 – 52.2)  | 1    | 0.98 – 1.03 | 0.659  |
| Chest CT                                                                                             | N     | No MV                    | MV                     | OR   | CI95%       | p*     |
| <b>Lung involvement area</b>                                                                         |       |                          |                        |      |             |        |
| ≤75% <sup>d</sup>                                                                                    | 588   | 488 (83.0%)              | 100 (17.0%)            |      |             |        |
| >75%                                                                                                 | 161   | 90 (55.9%)               | 71 (44.1%)             | 3.85 | 2.64 – 5.62 | <0.001 |
| <b>Dominant Pattern</b>                                                                              |       |                          |                        |      |             |        |
| Ground-glass opacity <sup>d</sup>                                                                    | 397   | 39 (73.6%)               | 14 (26.4%)             |      |             |        |
| Mixed                                                                                                | 205   | 162 (79.0%)              | 43 (21.0%)             | 0.96 | 0.64 – 1.45 | 0.846  |
| Crazy paving                                                                                         | 81    | 55 (67.9%)               | 26 (32.1%)             | 1.71 | 1.01 – 2.89 | 0.045  |
| Consolidation                                                                                        | 53    | 311 (78.3%)              | 86 (21.7%)             | 1.30 | 0.67 – 2.50 | 0.435  |
| Pleural effusion                                                                                     | 87    | 52 (59.8%)               | 35 (40.2%)             | 2.63 | 1.65 – 4.20 | <0.001 |
| Lymph node enlargement                                                                               | 158   | 116 (73.4%)              | 42 (26.6%)             | 1.31 | 0.88 – 1.96 | 0.188  |
| PAD (mm) <sup>c</sup>                                                                                | 754   | 583, 27.3 ± 4.1          | 171, 28.6 ± 4.3        | 1.07 | 1.03 – 1.12 | <0.001 |
| <b>Independent predictors of invasive mechanical ventilation (multivariate analysis)<sup>#</sup></b> |       |                          |                        |      |             |        |
|                                                                                                      | OR    | CI95%                    | p*                     |      |             |        |
| Age ≥ 60 years old                                                                                   | 2.55  | 1.73 – 3.74              | <0.001                 |      |             |        |
| Chronic liver disease                                                                                | 7.54  | 1.52 – 37.38             | 0.013                  |      |             |        |
| Lymphocytes <sup>a</sup>                                                                             | 0.94  | 0.91 – 0.98              | 0.003                  |      |             |        |
| C-reactive protein                                                                                   | 1.09  | 1.05 – 1.13              | <0.001                 |      |             |        |
| Lung involvement > 75%                                                                               | 2.06  | 1.37 – 3.09              | <0.001                 |      |             |        |
| PAD enlargement                                                                                      | 1.042 | 0.997 – 1.09             | 0.066                  |      |             |        |
| Pleural effusion                                                                                     | 2.14  | 1.27 – 3.61              | 0.004                  |      |             |        |

\* Logistic regression model and Wald test, p<0.05; <sup>a</sup> OR corresponds to each increment of 100 units of the variable; <sup>b</sup> n, median (IQR), <sup>c</sup> n, mean ± standard deviation; <sup>d</sup> reference variable

*# Variables initially included in the model: age  $\geq 60$  years old, chronic heart disease, chronic kidney disease, chronic liver disease, hypertension, diabetes, C-reactive protein, lymphocytes, lung parenchyma involvement  $> 75\%$ , pleural effusion and pulmonary artery diameter.*
